# Supplementary material for: Prospective forecasts of annual dengue hemorrhagic fever incidence in Thailand, 2010–2014
Source: PubMed Central journal article supplement — Proc Natl Acad Sci U S A. 2018 Feb 20;115(10):E2175–82. doi: 10.1073/pnas.1714457115 (PMC5877997; doi:10.1073/pnas.1714457115), 2018-02-20
Supplement: pnas.201714457SI.pdf [file pnas.201714457SI.pdf]

# Supporting Information

Lauer et al. 10.1073/pnas.1714457115

## SI Text

As displayed in Table S4, the smallest MAE by any model for any region was for Bangkok (MOPH region 0) using the incidence-only model (MAE = 0.286). However, because the baseline MAE for Bangkok was only slightly higher (MAE = 0.289), the incidence-only model rMAE was the second largest of any region (rMAE = 0.99). Thus, although the incidence-only model accurately forecasted DHF incidence in Bangkok, it did not add much value over a 10-y median due, in part, to there being no outbreaks in Bangkok during the testing phase.

Conversely, the incidence-only model had about twice as much error in MOPH region 12 (MAE = 0.59) as in Bangkok. However, the baseline model had nearly three times as much error as in Bangkok (MAE = 0.86), and therefore, the incidence-only rMAE for MOPH region 12 was the lowest of any model for any region (rMAE = 0.69). Thus, despite greater absolute error from the incidence-only model forecasts, there was more added benefit for that region over the baseline forecasts than for Bangkok. These examples show how MAE and rMAE can be used in tandem to give a more complete evaluation of model performance.

The receiver operating characteristic (ROC) curves for the incidence-only and WIP model outbreak forecasts for the testing phase are both significantly above the line of no discrimination but are not significantly different from each other (Fig. 5). The incidence-only model area under the receiver operating characteristic curve (AUC; estimate: 84.2%, 95% CI: 78.5–89.9%) was slightly larger than the WIP model AUC (82.9%, 95% CI: 76.3–89.6%). The sensitivity of the WIP model is marginally larger than that of the incidence-only model when specificity is large, suggesting that the WIP model showed very slightly better performance than the incidence-only model at larger outbreak thresholds.

The predictive distributions samples used to make the outbreak forecasts could have been obtained by estimating parameters in a Bayesian framework, including drawing posterior samples of the dispersion parameter, which may have changed the predictive performance of the models. However, due to the coverage rates observed by our model (80% of forecasts covered by the 80% prediction interval), we did not believe that it would be worth the additional computational complexity to use these methods.

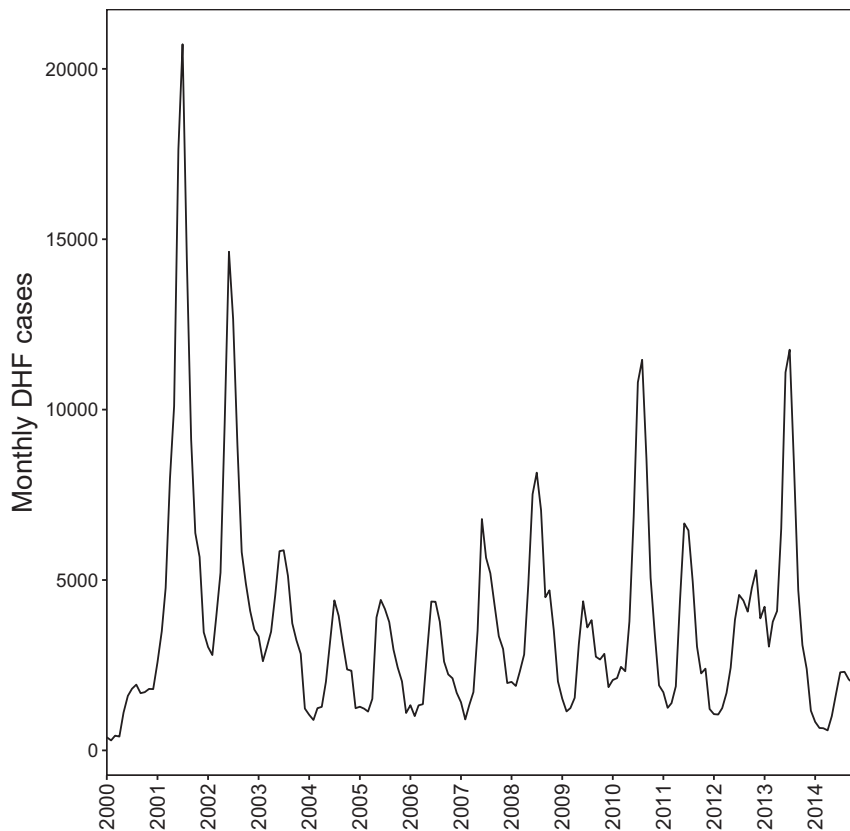

Fig. S1. Aggregated time series of DHF cases from 2000 to 2014.







**Table S3. Annual results for each model across all regions in the testing phase**

| Model          | Year | Mean provincial incidence | Outbreaks | MAE         | rMAE        | Forecasts better than baseline, % | 80% PI coverage |
|----------------|------|---------------------------|-----------|-------------|-------------|-----------------------------------|-----------------|
| WIP            | 2010 | 78                        | 12        | 0.53        | 0.73        | 60.5                              | 76.3            |
| Incidence only |      |                           |           | <b>0.53</b> | <b>0.73</b> | <b>68.4</b>                       | <b>80.3</b>     |
| Baseline       |      |                           |           | 0.72        | 1.00        |                                   |                 |
| WIP            | 2011 | 47                        | 2         | 0.65        | 1.05        | 47.4                              | 61.8            |
| Incidence only |      |                           |           | <b>0.59</b> | <b>0.95</b> | <b>55.3</b>                       | <b>78.9</b>     |
| Baseline       |      |                           |           | 0.61        | 1.00        |                                   |                 |
| WIP            | 2012 | 48                        | 1         | 0.43        | 0.90        | 60.5                              | <b>86.8</b>     |
| Incidence only |      |                           |           | <b>0.43</b> | <b>0.90</b> | <b>61.8</b>                       | 89.5            |
| Baseline       |      |                           |           | 0.48        | 1.00        |                                   |                 |
| WIP            | 2013 | 74                        | 23        | 0.57        | 0.79        | 51.3                              | <b>75.0</b>     |
| Incidence only |      |                           |           | <b>0.56</b> | <b>0.77</b> | <b>55.3</b>                       | 85.5            |
| Baseline       |      |                           |           | 0.73        | 1.00        |                                   |                 |
| WIP            | 2014 | 24                        | 0         | 1.00        | 0.89        | 61.8                              | 48.7            |
| Incidence only |      |                           |           | <b>0.85</b> | <b>0.75</b> | <b>82.9</b>                       | <b>65.8</b>     |
| Baseline       |      |                           |           | 1.13        | 1.00        |                                   |                 |

Numbers in bold highlight the model that performed best for each metric in each year. PI, predictive interval.

**Table S4. Regional results for each model across all years in the testing phase**

| Model          | MOPH region | Provinces | Mean provincial incidence | Outbreaks | MAE         | rMAE        | Forecasts better than baseline | 80% PI coverage |
|----------------|-------------|-----------|---------------------------|-----------|-------------|-------------|--------------------------------|-----------------|
| WIP            | 12          | 7         | 83                        | 3         | 0.62        | 0.72        | 68.6                           | 65.7            |
| Incidence only |             |           |                           |           | <b>0.59</b> | <b>0.69</b> | <b>77.1</b>                    | <b>74.3</b>     |
| Baseline       |             |           |                           |           | 0.86        | 1.00        |                                |                 |
| WIP            | 9           | 4         | 74                        | 3         | 0.58        | 0.84        | 70.0                           | 70.0            |
| Incidence only |             |           |                           |           | <b>0.48</b> | <b>0.70</b> | <b>75.0</b>                    | <b>85.0</b>     |
| Baseline       |             |           |                           |           | 0.69        | 1.00        |                                |                 |
| WIP            | 8           | 6         | 37                        | 5         | <b>0.78</b> | <b>0.71</b> | 70.0                           | 66.7            |
| Incidence only |             |           |                           |           | 0.83        | 0.75        | 70.0                           | 66.7            |
| Baseline       |             |           |                           |           | 1.10        | 1.00        |                                |                 |
| WIP            | 10          | 5         | 43                        | 4         | 0.56        | 0.82        | 60.0                           | <b>76.0</b>     |
| Incidence only |             |           |                           |           | <b>0.49</b> | <b>0.71</b> | <b>72.0</b>                    | <b>88.0</b>     |
| Baseline       |             |           |                           |           | 0.69        | 1.00        |                                |                 |
| WIP            | 1           | 8         | 45                        | 12        | <b>0.82</b> | <b>0.74</b> | 77.5                           | 50.0            |
| Incidence only |             |           |                           |           | 0.94        | 0.84        | 77.5                           | <b>55.0</b>     |
| Baseline       |             |           |                           |           | 1.11        | 1.00        |                                |                 |
| WIP            | 7           | 4         | 51                        | 4         | 0.56        | 0.76        | 60.0                           | <b>75.0</b>     |
| Incidence only |             |           |                           |           | <b>0.55</b> | <b>0.75</b> | <b>75.0</b>                    | 70.0            |
| Baseline       |             |           |                           |           | 0.74        | 1.00        |                                |                 |
| WIP            | 11          | 7         | 72                        | 3         | 0.71        | 0.79        | 62.9                           | 62.9            |
| Incidence only |             |           |                           |           | <b>0.69</b> | <b>0.77</b> | <b>65.7</b>                    | <b>77.1</b>     |
| Baseline       |             |           |                           |           | 0.90        | 1.00        |                                |                 |
| WIP            | 6           | 8         | 65                        | 1         | 0.51        | 1.01        | 42.5                           | <b>75.0</b>     |
| Incidence only |             |           |                           |           | <b>0.39</b> | <b>0.79</b> | <b>55.0</b>                    | 95.0            |
| Baseline       |             |           |                           |           | 0.50        | 1.00        |                                |                 |
| WIP            | 2           | 5         | 52                        | 2         | 0.62        | 0.93        | 48.0                           | 72.0            |
| Incidence only |             |           |                           |           | <b>0.56</b> | <b>0.84</b> | <b>68.0</b>                    | <b>76.0</b>     |
| Baseline       |             |           |                           |           | 0.66        | 1.00        |                                |                 |
| WIP            | 4           | 8         | 33                        | 0         | 0.60        | 1.04        | 42.5                           | <b>80.0</b>     |
| Incidence only |             |           |                           |           | <b>0.52</b> | <b>0.88</b> | <b>57.5</b>                    | 92.5            |
| Baseline       |             |           |                           |           | 0.58        | 1.00        |                                |                 |
| WIP            | 3           | 5         | 51                        | 0         | 0.68        | 1.17        | 52.0                           | 64.0            |
| Incidence only |             |           |                           |           | <b>0.57</b> | <b>0.98</b> | <b>56.0</b>                    | <b>80.0</b>     |
| Baseline       |             |           |                           |           | 0.58        | 1.00        |                                |                 |
| WIP            | 0           | 1         | 63                        | 0         | 0.58        | 2.00        | 20.0                           | 100.0           |
| Incidence only |             |           |                           |           | <b>0.29</b> | <b>0.99</b> | <b>40.0</b>                    | 100.0           |
| Baseline       |             |           |                           |           | 0.29        | 1.00        |                                |                 |
| WIP            | 5           | 8         | 47                        | 1         | 0.56        | 1.24        | 37.5                           | <b>77.5</b>     |
| Incidence only |             |           |                           |           | 0.47        | 1.03        | <b>45.0</b>                    | 92.5            |
| Baseline       |             |           |                           |           | <b>0.46</b> | <b>1.00</b> |                                |                 |

Numbers in bold highlight the model that performed best for each metric in each region. The regions are sorted by best model performance using rMAE from lowest to highest. PI, predictive interval.

## Other Supporting Information Files

[Table S5 \(XLSX\)](#)

[Table S6 \(XLSX\)](#)

[Table S7 \(XLSX\)](#)

[Table S8 \(XLSX\)](#)

[Table S9 \(XLSX\)](#)
